# Supplementary material
Source: publisher figshare collection journal article supplement (https://diabetesjournals.figshare.com/articles/dataset/_/21120535)
Supplement: Supplementary file 1 [file 1]

| Location        | Site Name                                                               | Site Address                                                         | Postcode | Principal Investigator(s)               |
|-----------------|-------------------------------------------------------------------------|----------------------------------------------------------------------|----------|-----------------------------------------|
| Basildon        | Basildon & Thurrock University Hospital NHS Foundation Trust            | Nethermayne, Basildon, Essex                                         | SS16 5NL | Dr Godwin Simon and Angelo Ramos RN     |
| Basingstoke     | Hampshire Hospitals NHS Foundation Trust                                | Basingstoke and North Hampshire Hospital                             | RG24 9NA | Dr Andrea Norris                        |
| Bath            | Royal United Hospitals Bath NHS Foundation Trust                        | Royal United Hospital, Bath                                          | BA1 3NG  | Dr Kai Tan                              |
| Birmingham      | University Hospitals Birmingham NHS Foundation Trust                    | Queen Elizabeth Hospital, Edgbaston, BIRMINGHAM                      | B15 2TH  | Dr Parth Narendran                      |
| Blackburn       | East Lancashire Hospitals NHS Trust                                     | Royal Blackburn Teaching Hospital, Hasingden Road, Blackburn, Lancs, | BB2 3HH  | Dr Shenaz Ramtoola                      |
| Blackburn       | Oakenhurst Medical Practice                                             | Barbara Castle Way Health Centre, Blackburn                          | BB2 1AX  | Dr Amar Ali                             |
| Bolton          | Bolton NHS Foundation Trust                                             | Royal Bolton Hospital, Minerva Road, Farnworth, Bolton               | BL4 0JR  | Dr Moulinath Banerjee                   |
| Bournemouth     | University Hospitals Dorset NHS Foundation Trust                        | Royal Bournemouth Hospital, Castle Lane East, Bournemouth, Dorset    | BH7 7DW  | Dr Augustin Brooks                      |
| Brighton        | Brighton & Sussex University Hospital NHS Trust                         | Royal Sussex County Hospital, Eastern Road, Brighton                 | BN2 5BE  | Dr Ali Chakera                          |
| Bristol         | North Bristol NHS Trust                                                 | Southmead Hospital, Bristol                                          | BS10 5ND | Dr Andrew Johnson & Dr Danijela Tatovic |
| Buckinghamshire | Buckinghamshire Healthcare NHS Trust                                    | Amersham Hospitals Alexandra Road, High Wycombe, Buckinghamshire     | HP11 2TT | Dr Chitrabhanu Ballav                   |
| Cardiff         | Cardiff and Vale University Health Board - University Hospital of Wales | Cardiff University , Heath Park, Cardiff                             | CF14 4XN | Prof Colin Dayan                        |
| Chester         | Countess of Chester Hospital NHS Foundation Trust                       | Countess of Chester Hospital, Liverpool Road, Chester, Cheshire.     | CH2 1UL  | Dr Sunil Nair                           |

| Location           | Site Name                                              | Site Address                                                                | Postcode | Principal Investigator(s)                          |
|--------------------|--------------------------------------------------------|-----------------------------------------------------------------------------|----------|----------------------------------------------------|
| Derby              | Derby Teaching Hospitals NHS Foundation Trust          | Uttoxeter Road, Derby                                                       | DE22 3NE | Prof Frances Game                                  |
| Exeter (Lead Site) | Royal Devon & Exeter NHS Foundation Trust              | NIHR Exeter Clinical Research Facility, RD&E Hospital, Barrack Road, Exeter | EX2 5DW  | Dr Angus Jones (CI)                                |
| Gloucester         | Gloucestershire Hospitals NHS Foundation Trust         | Gloucestershire Royal Hospital, Great Western Road, Gloucester              | GL1 3NN  | Susan Beames,RN                                    |
| Ipswich            | East Suffolk & North Essex NHS Foundation Trust        | The Ipswich Hospital, Heath Road, Ipswich                                   | IP4 5PD  | Prof Gerry Rayman                                  |
| Lincoln            | United Lincolnshire Hospitals NHS Trust                | Lincoln County Hospital, Greetwell Road, Lincoln                            | LN2 5QY  | Marie Snell RN<br>Susie Butler RN<br>Sarah Beck RN |
| Lincoln Community  | Lincoln Community Health Services NHS Trust            | Fen House, Fen Lane, Lincoln                                                | LN6 8UZ  | Janet Beecham RN                                   |
| Liverpool          | Liverpool University Hospitals NHS Foundation Trust    | Aintree University Hospital, Longmoor Lane, Liverpool                       | L9 7AL   | Prof John Wilding                                  |
| Llanelli           | Hywel Dda University Health Board                      | Prince Philip Hospital, Bryngwyn Mawr, Llanelli                             | SA14 8QF | Dr Sam Rice                                        |
| London             | St Georges University Hospital NHS Foundation Trust    | Blackshaw Road, Tooting, London                                             | SW17 0QT | Dr Mimi Chen                                       |
| Londonderry        | Western Health & Social Care Trust                     | Altnagelvin Hospital Campus, Glenshane Road, Londonderry, NI                | BT47 6SB | Dr Athinyaa Thiraviaraj                            |
| Maidstone          | Maindstone & Tunbridge Wells NHS Trust                 | Maidstone Hospital Hermitage Lane, Maidstone, Kent                          | ME19 4BF | Dr Siva Sivappriyan                                |
| Manchester         | Manchester University NHS Foundation Trust             | Manchester Royal Infirmary, Oxford Rd, Manchester                           | M13 9WL  | Dr Basil Issa                                      |
|                    |                                                        | Wythenshawe Hospital, Wythenshawe                                           | M23 9LT  |                                                    |
| Milton Keynes      | Milton Keynes University Hospital NHS Foundation Trust | Milton Keynes University Hospital Standing Way, Eaglestone, Milton Keynes,  | MK6 5LD  | Dr Asif Humayun and Rebecca Hinch RN               |

| Location        | Site Name                                                  | Site Address                                                        | Postcode | Principal Investigator(s)                     |
|-----------------|------------------------------------------------------------|---------------------------------------------------------------------|----------|-----------------------------------------------|
| Norfolk         | James Paget University Hospital NHS Foundation Trust       | James Paget Hospital, Lowestoft Road, Gorleston, Norfolk            | NR31 6LA | Dr Leena Krishnan & Dr Khin Swe Myint         |
| Northampton     | Northampton General Hospital NHS Trust                     | Cliftonville, Northampton                                           | NN1 5BD  | Dr Charles Fox & Dr Jennifer Prouten          |
| Norwich         | Norfolk & Norwich University Hospital NHS Foundation Trust | Norwich Medical School, University of East Anglia, Norwich, Norfolk | NR4 7TJ  | Prof Mike Sampson                             |
| Nottingham      | Nottingham University Hospital NHS Trust                   | Queens Medical Centre Derby Road Nottingham                         | NG7 2UH  | Dr Peter Mansell & Dr Carolyn Chee            |
| Oxford          | Oxford University Hospitals NHS Foundation Trust           | Churchill Hospital, Old Road, Headington, Oxford                    | OX3 7LE  | Dr Katharine Owen                             |
| Plymouth        | Plymouth Hospitals NHS Trust                               | Derriford, Plymouth                                                 | PL6 8DH  | Dr Ioannis Dimitropoulis                      |
| Portsmouth      | Portsmouth Hospitals NHS Trust                             | Queen Alexandra Hospital, Cosham, Portsmouth. Hants                 | PO6 3LY  | Prof Michael Cummings                         |
| Reading         | Royal Berkshire NHS Foundation Trust                       | Royal Berkshire Hospital, London Road, Reading, Berks               | RG1 5BS  | Dr Foteini Kavourra                           |
| Salford         | Northern Care Alliance NHS Foundation Trust                | Diabetes Centre Salford Royal Hospital Stott Lane Salford           | M6 8HD   | Dr Adrian Heald                               |
| Sheffield       | Sheffield Teaching Hospitals NHS Foundation Trust          | Northern General Hospital, Herries Road, Sheffield                  | S5 7AU   | Prof Simon Heller                             |
| Sherwood Forest | Sherwood Forest Hospitals NHS Foundation Trust             | Kings mill Hospital, Mansfield Road, Sutton In Ashfield, Notts      | NG17 4JL | Dr Sarbpreet Sihota & Dr Vakkat Muraleedharan |
| Solent          | The Solent NHS Trust                                       | William McLeod Way, Southampton                                     | SO16 4XE | Dr Tara Watson                                |
| Southern Health | Southern Health NHS Foundation Trust                       | Moorgreen Hospital, Botley Rd, West End, Southampton                | SO30 3JB | Dr Hermione Price                             |
| Stoke on Trent  | Midlands Partnership NHS Foundation Trust                  | Haywood Hospital Stoke on Trent                                     | ST6 7AG  | Mr Roger Whittaker & Sarah Orme RN            |
| Surrey          | Surrey and Sussex Healthcare NHS Trust                     | East Surrey Hospital, Redhill, Surrey                               | RH1 5RH  | Dr Ben Field                                  |

| Location      | Site Name                                                                       | Site Address                                                    | Postcode | Principal Investigator(s)                                      |
|---------------|---------------------------------------------------------------------------------|-----------------------------------------------------------------|----------|----------------------------------------------------------------|
| Swansea       | Swansea Bay University Health Board                                             | Morrison Hospital Swansea                                       | SA6 6NL  | Prof Stephen Bain                                              |
| Swindon       | Great Western Hospitals NHS Foundation Trust                                    | Marlborough Road, Swindon                                       | SN3 6BB  | Dr Beas Battacharya<br>Lesley Haxton RN<br>Suzannah Pegler ROT |
| Taunton       | Somerset NHS Foundation Trust                                                   | Musgrove Park Hospital, Parkfield Drive, Taunton                | TA1 5DA  | Catherine Thompson RN & Dr Rob Andrew                          |
| Torbay        | Torbay and South Devon NHS Foundation Trust                                     | Torbay Hospital, Lowes Bridge, Torquay                          | TQ2 7AA  | Dr Jamie Smith                                                 |
| Truro         | Royal Cornwall Hospitals NHS Trust                                              | Treliske, Truro, Cornwall                                       | TR1 3LJ  | Dr Duncan Browne & Dr Steve Creely                             |
| Warrington    | Warrington & Halton Hospitals NHS Foundation Trust                              | Lovely Lane, Warrington                                         | WA5 1QG  | Dr Rahul Yadav                                                 |
| Warwick       | South Warwickshire NHS Foundation Trust                                         | Warwick Hospital, Lakin Road, Warwick                           | CV34 5BW | Dr Rakhi Kakad                                                 |
| West Sussex   | Western Sussex Hospitals NHS Foundation Trust (Chichester & Worthing Hospitals) | St Richards Hospital, Spitalfield Road, Chichester, West Sussex | PO19 6SE | Dr Ken Laji                                                    |
| Wigan         | Wrightington, Wigan and Leigh Teaching Hospitals NHS Foundation Trust           | Royal Albert Edward Infirmary Wigan Lane Wigan                  | WN1 2NN  | Dr Mohit Kumar                                                 |
| Windsor       | Berkshire Healthcare NHS Foundation Trust                                       | King Edward VII Hospital St. Leonards Road Windsor              | SL4 3DP  | Dr Alirezi Mohammadi                                           |
| Wolverhampton | The Royal Wolverhampton NHS Trust                                               | New Cross Hospital, Wolverhampton Road, Wolverhampton,          | WV10 0QP | Dr James Young                                                 |
| Yeovil        | Yeovil District Hospital NHS Foundation Trust                                   | Higher Kingston Yeovil Somerset                                 | BA21 4AT | Dr Seshadri Pramodh                                            |
| York          | York & Scarborough Teaching Hospitals NHS Foundation Trust                      | York Hospital, wigginton road, York                             | YO31 8HE | Dr Vijay Jayagopal                                             |
